# Supplementary material for: Refractory Hypotension in a Late-Onset Mitochondrial Encephalomyopathy, Lactic Acidosis, and Stroke-like Episodes (MELAS) Male with m.3243 A>G Mutation: A Case Report
Source: MDPI journal article supplement (doi:10.3390/brainsci13071080), 2023-07-17
Supplement: s1 [file s1]

## Supplementary Material

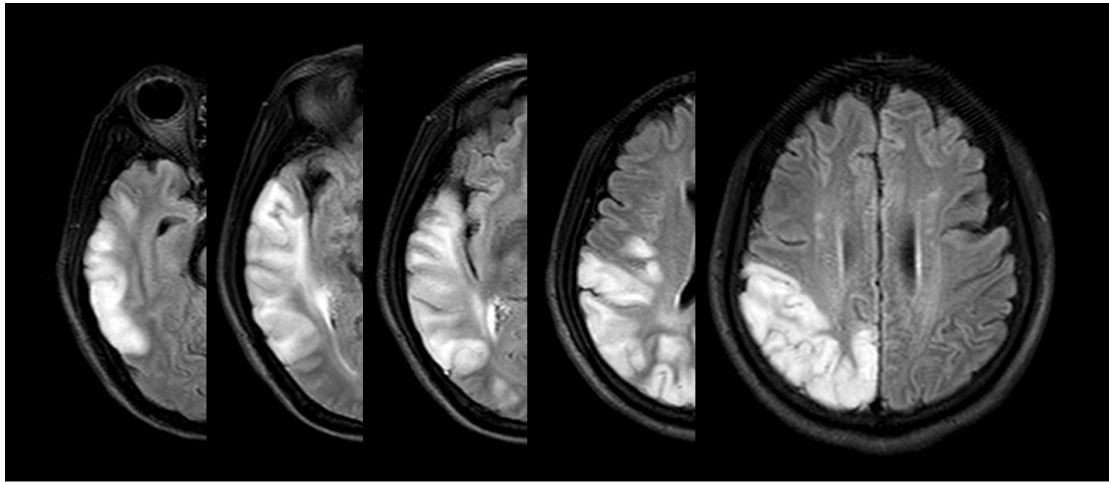

**Figure S1.** The patient experienced his first stroke-like episode two years ago, prior to the current hospitalization, and was diagnosed with right parieto-occipital temporal lobe cerebral infarction. Brain diffusion-weighted image (DWI) shows right parieto-occipital temporal lobe infarction lesion.

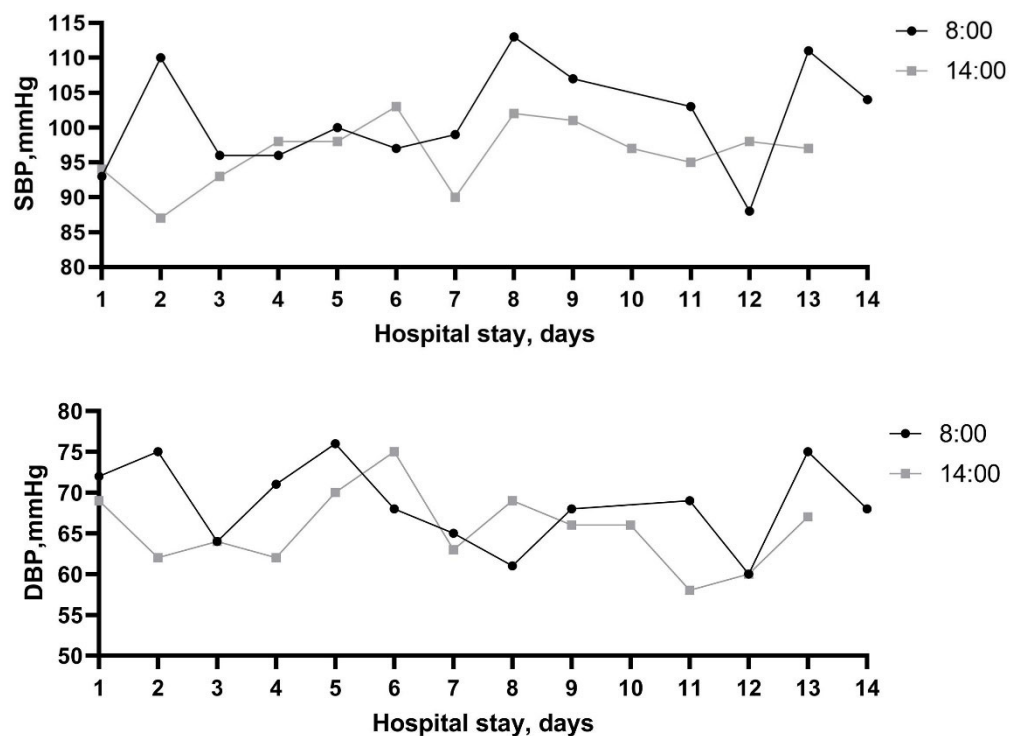

**Figure S2.** Changes of blood pressure levels during the first time of hospitalization.

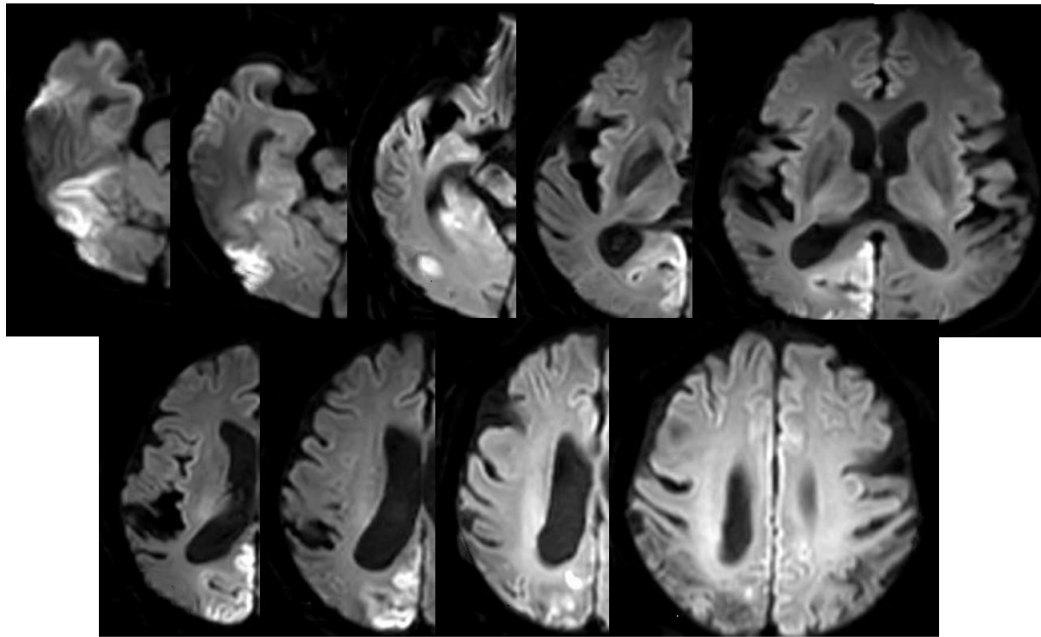

**Figure S3.** MRI shows multiple acute infarct-like lesions in the right parieto-occipital lobe and bilateral temporal gyrus.
